# Supplementary material
Source: Springer Nature journal article supplement (https://www.springermedizin.de/resource/supplementary/12904_2012_155_MOESM9_ESM.pdf/9517736)

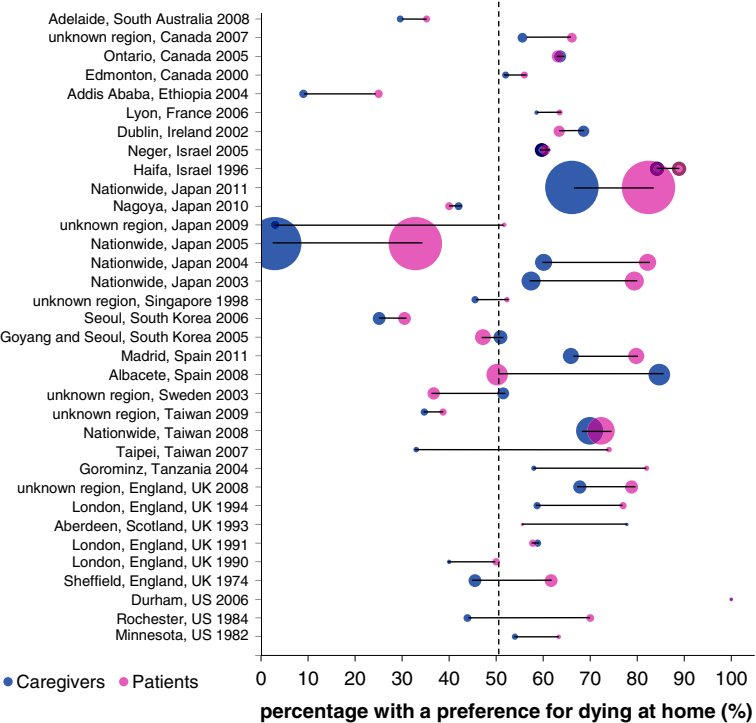

Supplement: MOESM9 [file 9517736]
